# Supplementary material for: An Integrated Management of Vegetable Agro-Biodiversity: A Case Study in the Puglia Region (Italy) on the Artichoke Landrace ‘Carciofo di Lucera’
Source: MDPI journal article supplement (doi:10.3390/horticulturae8030238), 2022-03-09
Supplement: s1 [file s1]

Archive with 1 entries (1 files):
- horticulturae-1608192-supplementary.pdf
