# Supplementary material for: An Integrated Management of Vegetable Agro-Biodiversity: A Case Study in the Puglia Region (Italy) on the Artichoke Landrace ‘Carciofo di Lucera’
Source: MDPI journal article supplement (doi:10.3390/horticulturae8030238), 2022-03-09
Supplement: s1 [file s1 › horticulturae-1608192-supplementary.pdf]

**An integrated management of vegetable agro-biodiversity: a case study in the Puglia region (Italy) on the artichoke landrace ‘Carciofo di Lucera’**

**Methodology**

Supplementary Table S1: Microsatellite markers used in this study. Locus name, sequence of primer pairs, and annealing temperature (Ta) are provided.

| <b>LOCUS</b>    | <b>PRIMER SEQUENCE (5'-3')</b>                         | <b>Ta ( °C)</b> |
|-----------------|--------------------------------------------------------|-----------------|
| <b>CELMS_07</b> | F: AAGGCAGGGTTAGAGTGACAAC<br>R: AGACTCCATGCTTCACACAGAT | 54              |
| <b>CELMS_14</b> | F: TCCAGCCATGCAAGAAAAGTAT<br>R: CCATCCTGAATCCATAACCAGT | 58              |
| <b>CELMS_48</b> | F: ATAACAGGACGAGGTGTGGAAG<br>R: CTACAGTTGCTTATTGGTCCCC | 54              |
| <b>CYEM_64</b>  | F: ATATCTCGCGTTTCCATAGGC<br>R: GCGATGGATCAACGATAGAGA   | 54              |
| <b>CYEM_93</b>  | F: CCACAAGCTTTCTGACCTCAA<br>R: CGTCCACCATGTGTAGAAACC   | 53              |
| <b>CYEM_111</b> | F: ATGAGGAAGGAGAGGGAGGAG<br>R: ACCAGCTAAGCGCCTCGTAT    | 55              |
| <b>CYEM_112</b> | F: GGCAAACCCCATGATTGTTAT<br>R: CCCCTTTAGATGTTCTCAACAAA | 52              |
| <b>CYEM_138</b> | F: ACCACAATTTCAACTCCAACG<br>R: GCAGAGGAAGGTGATGCATAG   | 58              |
| <b>CYEM_141</b> | F: CCCATGCATGAAACGAATAAC<br>R: CAGAAGAGGCATCTGAGACCA   | 55              |
| <b>CYEM_182</b> | F: TGAGATGGGGACATCATTCAT<br>R: GCCTTCAAAGTCAAAGGAGGA   | 54              |
| <b>CYEM_188</b> | F: GCAACAGCAAGGAGGATTTTA<br>R: CAGACATCAGTAGGGGCTGAG   | 57              |
| <b>CYEM_210</b> | F: CAAAGCTGACACCGATACTCC<br>R: CCAGAGACGGCTTACAATCAG   | 55              |
| <b>CYEM_218</b> | F: ATCTTCAGCAATCAGCATTCG<br>R: AGTGTCTGCGTTAGCTCAAA    | 54              |
| <b>CYEM_232</b> | F: ATGCCGTTGACTCACAAGACT<br>R: CCTAAAATGGCCACAAGAACA   | 52              |
| <b>CYEM_253</b> | F: GGGGTATCACATGGAGCTGTT<br>R: GCCATTTCTTTGTTTCAGACGA  | 53              |
| <b>CYEM_280</b> | F: GCCCCAACAAGATTTCTCTTC<br>R: AAGAACCATTTGCCTCATCCT   | 53              |
| <b>CYEM_291</b> | F: CTCGAAAAGTTAGTGGCGTTG<br>R: TCCCCCAAAGATAATTCGAT    | 50              |

## WP6 – Databases.

- ***Species and varieties.*** All the local varieties (LV) found were listed in this section. The inclusion of the LV within this section was propaedeutic to other sections, as this part contained the Italian, Latin and local denominations that were consistently used throughout the entire database (Supplementary figure S4A). For every species, it was possible to add, modify or delete the local varieties (Supplementary figure S4B)
- ***Farm descriptive sheet.*** The information regarding the farms in this subsection were divided into several tabs: in the first one, information was collected, such as farm name, localization (including a georeferenced map), and soil characteristics. In the second tab, data related to the farmer (name, age, email, etc.) were collected. Finally, the third tab was used to add further, not codified, information or comments (Supplementary figure S5).
- ***Resources descriptive sheet.*** Similarly to the “Farms descriptive sheet”, the information was divided into tabs. In the first tab, the genetic resource was introduced by indicating its name, localization, name of local variety, etc. (Supplementary figure S6). Additional information was implemented into the other tabs to fully characterize the variety, e.g. resistance/tolerance to abiotic and biotic stresses (Supplementary figure S6), organoleptic qualities (Supplementary figure S7), etc.
- ***Descriptors.*** In this section, the specific characteristics of the considered landrace were covered and catalogued. In the specific case of the CdL (Supplementary figure S8), the available tabs were designed to allow a fully characterization of the resource, starting from general information, characteristics of the plants, of the leaves, etc., to those of the flower head (shape of the section and of the apex, etc. – Supplementary figure S9).

Resource Sheet

Introduction
AA.1-3
AA.4 - CD.1
CD.2-4
CD.5-7
FSE.1-5
CTA.1-3
CTA.4-7
CTA.8
Attachments

SHEET STATUS

State
Biodiverso phase
Approved
I 2014-2015
II 2016-2017

INTRODUCTION

Date
Accession n.
Species
Variety
25/09/2015
0
Carrot
Di Polignano

Local species name
Local variety name
Synonyms
Carrot
Carota giallo-viola di Polignano
Bastinaca di San Vito

Reporting
Farm name
Name of interviewer
Select
Giuliani Oronzo
Angelo Signore

LOCALISATION

Map
Satellite
Latitude
Longitude
41.0110211
17.1880975
Georeferencing result:

Close

Supplementary figure S1 – resources description sheet (introduction tab).

## ARTICULO 21.

## فصل

De la manera de sembrar la kinaria [grígo, y cinara latine, que es el cardo].

Es de dos especies (según Abu el Jaiz), hortense y silvestre; el qual es el *karist*, ó según otros el *kadjar*. Tratando de esta Aben Hefaj dice, que según Junio se pone en noviembre; que lo que de ella se planta son sus raíces, las quales deben estar coladas y operacion ser regadas en el campo; y que su fruto se cosecha en la primavera. Abu Abdalab y otros dicen, que conviene al cardo la tierra adusta, la negra engrasada, y el agua dulce de río y de fuentes; y que su siembra se debe en la estación del otoño y en enero. La Agricultura Nabathica añade, que tambien en febrero en taberos bica latidos y beneficiados con estiércol sutil y demanzado, el qual se incorpora con la tierra y con ella blandamente la siembra; que así para sembrar esta cocho para plantar sus posturas se escogen los sitios o hollados de los huertos; que se pongan estos últimos como á distancia de quatro palmos uno de otro, y se riegan hasta que vegeten continuándoles despues el riego dos veces en la semana el dilatado espacio del verano y del otoño, y cortándolo solo en la estación del invierno; y que despues de cortado el cardo cada año, se remueva de la raíz que quedó dentro de tierra. Según Abu Abdalab, cultivándose mucho, y enercollándose con estiércol antiguo y diáfano continúan riegos en el verano, echa grueso el fruto. La etichonfa es una de

1. Éstase sembrada en lugar de cardo.

las especies, y el que quiera puede trasplantar con de la selva á los huertos en el mes de marzo. Según la Agricultura Nabathica, arrancando del cardo la raíz sin ramas, y dividiendo y plantado cada uno de estos de por sí en el mes referido, viene prontamente; lo qual es probado por experiencia.

## ARTICULO 22.

De la manera de sembrar la rada hortense.

Según la Agricultura Nabathica, es llamada *fiyan* y es de dos especies, hortense y silvestre. Junio citado en el libro de Aben Hefaj dice, que la rada se siembra en los paños calientes de mucho sol, y que se siembra en toda la estación de primavera. Por lo demás (según Abu Abdalab y otros), la tierra que le conviene es la engrasada, la adusta y la blanda. Otros dicen, que la tierra fuerte es la mejor para sembrarla. Lo qual se hace en enero, febrero, y marzo en taberos de tierra blanda, encolado cada uno con dos cueros de estiércol repodrido y delgado. Consecutivamente á su semadura se riega, y de allí en adelante se tiene cuidado de baello dos veces en la semana hasta que atenga bien y vegete. Luego se escarda, y despues de sedienta se riega una vez en la semana por todas las estaciones de verano, otoño y primavera; excepto el invierno, en cuya estación se le corta el agua puesto que sus lluvias la alimentan. Plantando su ra-

1. Éstase sembrada en lugar de cardo.  
2. Éstase sembrada, como en el libro de Ben-el-Beitar, en lugar de sembrar de la copia. En el original caece esta dición de puntos.  
3. En el original caece la dición de puntos.

Supplementary figure S2 – “Libro de agricultura” translated version by Banqueri (1802), pages 302 and 303, from Google books.

Suivant Aboul'-Khaïr et autres, la chélideine glauque aime les terres froides, rudes, amendées, celles qui sont sableuses ou légères. La graine se sème en septembre, dans des carreaux qu'on prépare dans un terrain cultivé et fumé, de la même manière que celle des basilics. On fait arriver l'eau avec prudence et doucement, ayant soin de continuer les arrosements jusqu'à ce que cette graine soit levée. On doit aussi arroser jusqu'à ce que le jeune plant ait acquis de la force; on donne un binage, on laisse désirer l'eau, puis on la donne et on continue ainsi de le faire deux fois par semaine pendant le cours des chaleurs, jusqu'à ce qu'on ait atteint l'automne ou l'hiver, saisons pendant lesquelles les pluies suffisent pour la nutrition de la plante. On a soin de sarcler les mauvaises herbes qui peuvent naître au milieu des semis. On replante le jeune plantaussitôt qu'il est arrivé au point de pouvoir l'être. On gouverne ce qu'on repique, ainsi qu'il a été dit antérieurement. Le glaucium aime l'eau douce et fraîche des puits et celle des fontaines. Il vit environ quatre ans. On prépare avec la fleur les collyres rafraichissants pour les yeux. Le suc exprimé de ses feuilles est employé utilement contre les érysipèles et les brûlures par le feu quand on l'applique en liniment; on appelle sa graine *nassá*.

## ARTICLE II.

Culture du kinaria, artichaut (1).

Suivant Aboul'-Khaïr, il y en a deux espèces: le kinaria des jardins et le kinaria des champs, ou sauvage. C'est le *tha-*

(1) الكبر, al-kadjar, en persan كندر al-kanghar. L'auteur indique deux espèces, l'une cultivée et l'autre sauvage. La première semble être spécialement l'artichaut, *cinara scolymus*, Linn. *Kinara*, Géop., XII, 39, Σαλμαρος, Diosc., III, 16, Κάκτος, Théophr., H. Pl.

*riah*, et suivant d'autres le *kadjar*. Ibn-el-Faël dit, en parlant du kadjar, que suivant Junius on le sème au mois du second tischerin; ce qu'on plante du kinaria, c'est le pied (l'œilleton). Le fruit atteint sa maturité au printemps. Il faut garnir le pied de fumier; il aime l'eau dans l'été. Ibn-el-Faël et autres disent que le kinaria aime la terre grasse, noire, fumée, et l'eau douce des rivières et des fontaines. La graine se sème en automne et en janvier. Suivant l'Agriculture nabathéenne, c'est en février que se fait le semis, dans des carreaux très-bien cultivés et fumés avec un engrais menu et menu; on l'incorpore bien au sol, puis on y mêle la graine avec précaution. Il faut choisir, pour semer la graine et pour planter les jeunes artichauts, les emplacements où ils ne puissent être foulés aux pieds par les ouvriers du jardin. On laisse entre chaque pied une distance de quatre empanes (0<sup>m</sup>,924) environ; on arrose deux fois par semaine pendant le cours de l'été et de l'automne, et on cesse entièrement en hiver. L'artichaut se renouvelle chaque année au moyen de ce qui a été détaché par éclat des pieds restés en terre. Suivant Ibn-el-Faël, il faut donner beaucoup de culture et d'engrais vieux. On a soin de bien arroser dans le cours de l'été; par ce moyen on aura de gros fruits. Il y a une espèce nommée *harchaf*, que les amateurs arrachent en mars dans les lieux sauvages (où il croît), pour le planter dans les jardins. Suivant l'Agriculture nabathéenne, on enlève la souche (mère) de l'artichaut (qu'on rejette) à l'exception des œilletons ou pousses qu'on divise et qu'on replante et qui réussissent bien. Ce travail se fait en mars.

VI, 4; *cinara*, Colum., XI, 3, *Carduus*, Pallad. Mart., IX, 1. Notre auteur réserve le nom de *harchaf* حرشاف, Avic., I, 176, à l'artichaut sauvage, qui est en Égypte celui de l'artichaut cultivé; Boé, Cult. Egypt., p. 64. Ce serait alors le *carduus silvestris* alter de Plin., XX, 99. *Kanghar* paraissant s'appliquer plus spécialement au cardon, *cinara cordocellus*, Linn. (Castel, lex. pers.), il est possible que notre auteur l'ait eu aussi en vue.

Supplementary figure S3 – “Le livre de l’agriculture” J.-J. Clément Mullet (1866), pages 291 and 292, from Google books.

Species and Varieties Management

| Id | Name                              | Species                                                                | Modify                                                                                                                                                                      |
|----|-----------------------------------|------------------------------------------------------------------------|-----------------------------------------------------------------------------------------------------------------------------------------------------------------------------|
| 19 | Garlic                            | Allium sativum L.                                                      | 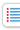 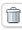     |
| 20 | Watermelon                        | Citrullus lanatus (Thunberg) Matsumura et Nakai                        | 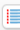 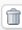     |
| 1  | Sweet potato                      | Ipomoea batatas L.                                                     | 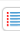 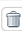     |
| 2  | Swiss chard                       | Beta vulgaris var. cicla L.                                            | 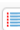 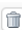     |
| 21 | Caper                             | Capparis spinosa L.                                                    | 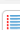 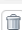     |
| 3  | Artichoke                         | Cynara cardunculus L. subsp. scolymus (L.) Hayek                       | 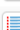 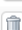     |
| 43 | King trumpet mushroom             | Scolymus hispanicus L.                                                 | 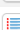 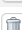     |
| 4  | Carrot                            | Daucus carota L.                                                       | 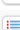 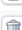     |
| 5  | Cauliflower                       | Brassica oleracea L. (var. botrytis)                                   | 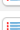 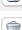     |
| 6  | Broccoli                          | Brassica oleracea L. (var. italica)                                    | 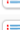 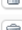     |
| 34 | Cabbage                           | Brassica oleracea L. conva. capitata                                   | 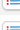 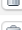     |
| 7  | Kale                              | Brassica oleracea L. (var. acephala)                                   | 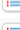 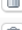     |
| 22 | Kohlrabi                          | Brassica oleracea L. (var. gongylodes)                                 | 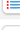 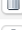     |
| 8  | Cucumber                          | Cucumis sativus L.                                                     | 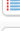 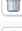     |
| 9  | Chicory                           | Cichorium intybus L.                                                   | 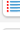 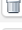     |
| 10 | Rapini                            | Brassica rapa L. (gruppo broccoletto)                                  | 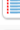 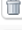     |
| 11 | Onion                             | Allium cepa L.                                                         | 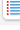 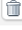     |
| 42 | Garden cress                      | Lepidium sativum L.                                                    | 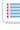 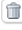     |
| 23 | French bean                       | Phaseolus vulgaris L.                                                  | 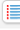 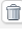     |
| 12 | Cowpea                            | Vigna unguiculata (L.) Walp. subsp. unguiculata cultigroup unguiculata | 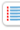 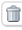     |
| 45 | Chinese long-bean, asparagus-bean | Vigna unguiculata (L.) Walp. subsp. sesquipedalis                      | 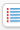 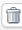   |
| 13 | Faba bean                         | Vicia faba L.                                                          | 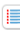 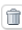 |
| 33 | Fennel                            | Foeniculum vulgare M. var. azoricum                                    | 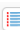 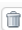 |
| 24 | Calabash                          | Lagenaria siceraria (Molina) Standl.                                   | 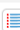 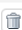 |
| 36 | Lettuce                           | Lactuca sativa L.                                                      | 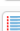 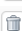 |
| 25 | Eggplant                          | Solanum melongena L.                                                   | 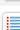 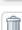 |

Manage the varieties of the species: Artichoke

| Id | Name                                    | Page name on BiodiverSO website (it is used by WebGIS to call up the variety page) | Actions                                                                               |
|----|-----------------------------------------|------------------------------------------------------------------------------------|---------------------------------------------------------------------------------------|
| 68 | Bianco di Fasano                        |                                                                                    | 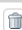 |
| 65 | Bianco di Ostuni                        | bianco-di-ostuni                                                                   | 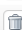 |
| 13 | Bianco di Taranto                       | bianco-di-taranto                                                                  | 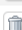 |
| 17 | Brindisino                              | brindisino                                                                         | 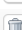 |
| 14 | Centofoglie di Rutigliano               | centofoglie-di-rutigliano                                                          | 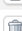 |
| 61 | di Lucera                               | di-Lucera                                                                          | 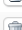 |
| 16 | Francesina (Violetto di San Ferdinando) | francesina                                                                         | 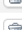 |
| 15 | locale di Mola                          | locale-di-mola                                                                     | 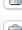 |
| 64 | Nero del Salento                        | nero-del-salento                                                                   | 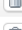 |
| 67 | Nero di Ostuni                          | nero-di-ostuni                                                                     | 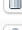 |
| 81 | Tricasino spinoso                       | tricasino-spinoso                                                                  | 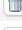 |
| 11 | Verde di Putignano                      | carciofo-verde-di-putignano                                                        | 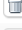 |
| 12 | Violetto di Putignano                   | violetto-di-putignano                                                              | 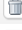 |
|    |                                         |                                                                                    | 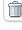 |

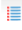 = Change the variety for the species
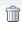 = Delete

Supplementary figure S4 – Section for the management of the collected species and varieties.

Farm description sheet

Identificazione Azienda
Dati Agricoltore
Notizie

GENERAL DETECTION DATA

Date
Farm name
Name of interviewer
Biodiverso phase

08/04/2015
Chiarella Vito
Angelo Signore
I 2014-2015
II 2016-2017

FARM IDENTIFICATION DATA

Province
Locality
Address
Postal code

Bari
Polignano a Mare
Strada Comunale Marinesca
70044

Map
Satellite

Latitude
Longitude

40.9827415
17.1947551

Altitude (above sea level)

100

Orography

Hill (medium)

Georeferencing result:

SOIL CHARACTERISTICS

1 - Slope
2 - Exposure
3 - Soil texture
4 - Gravel presence

Scarce (<20%)
East
Loam
Scarce

Close

Supplementary figure S5 – Farm description sheet.

Resource Sheet

Introduction
AA.1-3
AA.4 - CD.1
**CD.2.4**
CD.5-7
FSE.1-5
CTA.1-3
CTA.4-7
CTA.8
Attachments

**CD.2 Agronomic characteristics (also in discursive terms)**

|       |           |                        |
|-------|-----------|------------------------|
| Yield | Precocity | Precocity of flowering |
|       |           |                        |
| Other |           |                        |
|       |           |                        |

**CD.3 Abiotic stresses (indicate the susceptibility/resistance that the farmer attributes to the local variety)**

|          |                  |                 |
|----------|------------------|-----------------|
| Drought  | High temperature | Low temperature |
|          |                  |                 |
| Salinity | Water excess     | pH of the soil  |
| medium   |                  |                 |
| Other    |                  |                 |
|          |                  |                 |

**CD.4 Biotic stresses**

Indicate the specific pathogens for which the farmer recognises that the local variety is susceptible/resistant

Close

Supplementary figure S6 – resources description sheet (agronomic characteristics).

Resource sheet

Introduction
AA.1-3
AA.4 - CD.1
CD.2-4
CD.5-7
FSE.1-5
CTA.1-3
CTA.4-7
CTA.8
Attachments

CD.5 Organoleptic qualities

|                              |                |                     |
|------------------------------|----------------|---------------------|
| Edible quality               | Flavour, aroma | Fragrance intensity |
|                              | sweet          |                     |
| Consistency                  | Other          |                     |
| E.g. firm, juicy, fibrous... |                |                     |

CD.6 Nutritional/medicinal qualities

Transcribe, as far as possible, the exact words by the farmer

CD.7 Market factors

|               |                  |                 |
|---------------|------------------|-----------------|
| Marketability | Transportability | Long shelf life |
| excellent     | good             | very bad        |
| Other         |                  |                 |
|               |                  |                 |

Close

Supplementary figure S7 – resources description sheet (organoleptic and nutritional qualities, market factors, etc.).

Variety sheet

SPECIES CLASSIFICATION - Accessions name: **Violetto di Putignano** - Genus and Species: **Cynara cardunculus L. subsp. scolymus (L.) Hayek**

General characteristics
Characteristics of the plant
Characteristics of leaves
Characteristics of the main flower's head
Characteristics of the outer bracts
Qualitative and nutritional characteristics
Shhet's authors and note
Attachments
Sources

INFORMATIVE SHEET STATUS

State
Approved

Species
Artichoke

Variety
Violetto di Putignano

New variety
clone n. 65 recovered by meristem apex c

GENERAL CHARACTERISTICS

Sowing time
Transplantation in July-September

Harvesting period
January-February

Reproductive cycle under normal growing conditions (days)

Portion of the plant used as the main product
Head

Utilisation
Food

Close

Supplementary figure S8 – main tab for the characterization of the variety.

Variety sheet

**SPECIES CLASSIFICATION** - Accessions name: **Violetto di Putignano** - Genus and Species: ***Cynara cardunculus* L. subsp. *scolymus* (L.) Hayek**

General characteristics
Plant characteristics
Leaves characteristics
**Characteristics of the main head**

Characteristics of the outer bracts
Qualitative and nutritional characteristics
Authors and notes
Attachments
Sources

**CHARACTERISTICS OF THE MAIN HEAD**

Height (cm)
12.5
Diameter (cm)
8
Weight with 5 cm of stem (g)
253

**Longitudinal section shape**

☐ triangular
☒ ovate
☐ oblong
☐ circular
☐ oblate

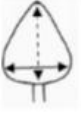
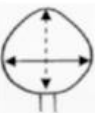
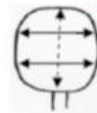
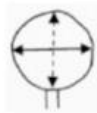
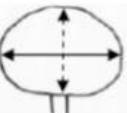

**Apex shape**

☒ acute
☐ rounded
☐ flat
☐ depressed

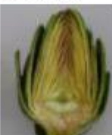
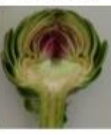
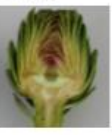
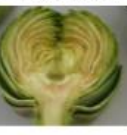

**Anthocyanin coloration of inner bracts**

absent or very weak

**Density of inner bracts**

☐ sparse
☐ medium
☒ dense

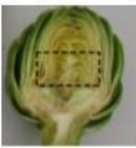
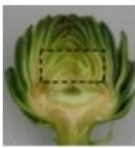
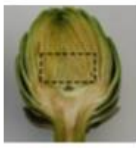

**Period of formation of the main head**

medium

Close

Supplementary figure S9 – tab for the characterization of the main flower head of the CdL.
